# Supplementary material for: Le point sur les cultivars de peuplier-VI: Trichobel et Koster
Source: Frontiers journal article supplement (doi:10.3389/fpsyt.2024.1347476), 2002-01-01

# Supplementary file 1: Search strategy

| SEARCH STRATEGY: PUBMED |                                                                                                                                                                                                                                                                                                                                                                                                                                                                                                                                                                                                                                                                                                                                                                                                                                                                                                                                                                                                                                                                                                                                                                                                                                                                                                                                                                                                                                                                                                                                                                                                                                                                                                                                                                                                                                                                                                                                                                                                                                                                                                                                  |
|-------------------------|----------------------------------------------------------------------------------------------------------------------------------------------------------------------------------------------------------------------------------------------------------------------------------------------------------------------------------------------------------------------------------------------------------------------------------------------------------------------------------------------------------------------------------------------------------------------------------------------------------------------------------------------------------------------------------------------------------------------------------------------------------------------------------------------------------------------------------------------------------------------------------------------------------------------------------------------------------------------------------------------------------------------------------------------------------------------------------------------------------------------------------------------------------------------------------------------------------------------------------------------------------------------------------------------------------------------------------------------------------------------------------------------------------------------------------------------------------------------------------------------------------------------------------------------------------------------------------------------------------------------------------------------------------------------------------------------------------------------------------------------------------------------------------------------------------------------------------------------------------------------------------------------------------------------------------------------------------------------------------------------------------------------------------------------------------------------------------------------------------------------------------|
| S.NO                    | SEARCH TERMS                                                                                                                                                                                                                                                                                                                                                                                                                                                                                                                                                                                                                                                                                                                                                                                                                                                                                                                                                                                                                                                                                                                                                                                                                                                                                                                                                                                                                                                                                                                                                                                                                                                                                                                                                                                                                                                                                                                                                                                                                                                                                                                     |
| #1                      | <p>Search: ((<b>frailty</b>) AND (<b>stroke</b>)) AND (<b>mortality</b>)</p> <p>("frailty"[MeSH Terms] OR "frailty"[All Fields] OR "frailties"[All Fields]) AND ("stroke"[MeSH Terms] OR "stroke"[All Fields] OR "strokes"[All Fields] OR "stroke s"[All Fields]) AND ("mortality"[MeSH Terms] OR "mortality"[All Fields] OR "mortalities"[All Fields] OR "mortality"[MeSH Subheading])</p> <p><b>Translations</b></p> <p><b>frailty:</b> "frailty"[MeSH Terms] OR "frailty"[All Fields] OR "frailties"[All Fields]</p> <p><b>stroke:</b> "stroke"[MeSH Terms] OR "stroke"[All Fields] OR "strokes"[All Fields] OR "stroke's"[All Fields]</p> <p><b>mortality:</b> "mortality"[MeSH Terms] OR "mortality"[All Fields] OR "mortalities"[All Fields] OR "mortality"[Subheading]</p>                                                                                                                                                                                                                                                                                                                                                                                                                                                                                                                                                                                                                                                                                                                                                                                                                                                                                                                                                                                                                                                                                                                                                                                                                                                                                                                                                |
| #2                      | <p>Search: ((<b>frailty</b>) AND (<b>stroke</b>)) AND (<b>poor functional outcome</b>)</p> <p>("frailty"[MeSH Terms] OR "frailty"[All Fields] OR "frailties"[All Fields]) AND ("stroke"[MeSH Terms] OR "stroke"[All Fields] OR "strokes"[All Fields] OR "stroke s"[All Fields]) AND ((("poverty"[MeSH Terms] OR "poverty"[All Fields] OR "poor"[All Fields]) AND ("functional"[All Fields] OR "functional s"[All Fields] OR "functionalities"[All Fields] OR "functionality"[All Fields] OR "functionalization"[All Fields] OR "functionalizations"[All Fields] OR "functionalize"[All Fields] OR "functionalized"[All Fields] OR "functionalizes"[All Fields] OR "functionalizing"[All Fields] OR "functionally"[All Fields] OR "functionals"[All Fields] OR "functioned"[All Fields] OR "functioning"[All Fields] OR "functionings"[All Fields] OR "functions"[All Fields] OR "physiology"[MeSH Subheading] OR "physiology"[All Fields] OR "function"[All Fields] OR "physiology"[MeSH Terms]) AND ("outcome"[All Fields] OR "outcomes"[All Fields]))</p> <p><b>Translations</b></p> <p><b>frailty:</b> "frailty"[MeSH Terms] OR "frailty"[All Fields] OR "frailties"[All Fields]</p> <p><b>stroke:</b> "stroke"[MeSH Terms] OR "stroke"[All Fields] OR "strokes"[All Fields] OR "stroke's"[All Fields]</p> <p><b>poor:</b> "poverty"[MeSH Terms] OR "poverty"[All Fields] OR "poor"[All Fields]</p> <p><b>functional:</b> "functional"[All Fields] OR "functional's"[All Fields] OR "functionalities"[All Fields] OR "functionality"[All Fields] OR "functionalization"[All Fields] OR "functionalizations"[All Fields] OR "functionalize"[All Fields] OR "functionalized"[All Fields] OR "functionalizes"[All Fields] OR "functionalizing"[All Fields] OR "functionally"[All Fields] OR "functionals"[All Fields] OR "functioned"[All Fields] OR "functioning"[All Fields] OR "functionings"[All Fields] OR "functions"[All Fields] OR "physiology"[Subheading] OR "physiology"[All Fields] OR "function"[All Fields] OR "physiology"[MeSH Terms]</p> <p><b>outcome:</b> "outcome"[All Fields] OR "outcomes"[All Fields]</p> |
| #1<br>OR<br>#2          | <p>Search: ((<b>frailty</b>) AND (<b>stroke</b>)) AND ((<b>poor functional outcome</b>) OR (<b>Mortality</b>))</p> <p>("frailty"[MeSH Terms] OR "frailty"[All Fields] OR "frailties"[All Fields]) AND ("stroke"[MeSH Terms] OR "stroke"[All Fields] OR "strokes"[All Fields] OR "stroke s"[All Fields]) AND (((("poverty"[MeSH Terms] OR "poverty"[All Fields] OR "poor"[All Fields]) AND ("functional"[All Fields] OR "functional s"[All Fields] OR "functionalities"[All Fields] OR "functionality"[All Fields] OR "functionalization"[All Fields] OR "functionalizations"[All Fields] OR "functionalize"[All Fields] OR "functionalized"[All Fields] OR "functionalizes"[All Fields] OR "functionalizing"[All Fields] OR "functionally"[All Fields] OR "functionals"[All Fields] OR "functioned"[All Fields] OR "functioning"[All Fields] OR "functionings"[All Fields] OR "functions"[All Fields] OR "physiology"[MeSH Subheading] OR "physiology"[All Fields] OR "function"[All Fields] OR "physiology"[MeSH Terms]) AND ("outcome"[All Fields] OR</p>                                                                                                                                                                                                                                                                                                                                                                                                                                                                                                                                                                                                                                                                                                                                                                                                                                                                                                                                                                                                                                                                      |

|                                        |                                                                                                                                                                                                                                                                                                                                                                                                                                                                                                                                                                                                                                                                                                                                                                                                                                                                                                                                                                                                                                                                                                                                                                                                                                                                                                                             |
|----------------------------------------|-----------------------------------------------------------------------------------------------------------------------------------------------------------------------------------------------------------------------------------------------------------------------------------------------------------------------------------------------------------------------------------------------------------------------------------------------------------------------------------------------------------------------------------------------------------------------------------------------------------------------------------------------------------------------------------------------------------------------------------------------------------------------------------------------------------------------------------------------------------------------------------------------------------------------------------------------------------------------------------------------------------------------------------------------------------------------------------------------------------------------------------------------------------------------------------------------------------------------------------------------------------------------------------------------------------------------------|
|                                        | "outcomes"[All Fields])) OR ("mortality"[MeSH Terms] OR "mortality"[All Fields] OR "mortalities"[All Fields] OR "mortality"[MeSH Subheading]))<br><b>Translations</b><br><b>frailty:</b> "frailty"[MeSH Terms] OR "frailty"[All Fields] OR "frailties"[All Fields]<br><b>stroke:</b> "stroke"[MeSH Terms] OR "stroke"[All Fields] OR "strokes"[All Fields] OR "stroke's"[All Fields]<br><b>poor:</b> "poverty"[MeSH Terms] OR "poverty"[All Fields] OR "poor"[All Fields]<br><b>functional:</b> "functional"[All Fields] OR "functional's"[All Fields] OR "functionalities"[All Fields] OR "functionality"[All Fields] OR "functionalization"[All Fields] OR "functionalizations"[All Fields] OR "functionalize"[All Fields] OR "functionalized"[All Fields] OR "functionalizes"[All Fields] OR "functionalizing"[All Fields] OR "functionally"[All Fields] OR "functionals"[All Fields] OR "functioned"[All Fields] OR "functioning"[All Fields] OR "functionings"[All Fields] OR "functions"[All Fields] OR "physiology"[Subheading] OR "physiology"[All Fields] OR "function"[All Fields] OR "physiology"[MeSH Terms]<br><b>outcome:</b> "outcome"[All Fields] OR "outcomes"[All Fields]<br><b>Mortality:</b> "mortality"[MeSH Terms] OR "mortality"[All Fields] OR "mortalities"[All Fields] OR "mortality"[Subheading] |
| <b>SEARCH STRATEGY: SCIENCE DIRECT</b> |                                                                                                                                                                                                                                                                                                                                                                                                                                                                                                                                                                                                                                                                                                                                                                                                                                                                                                                                                                                                                                                                                                                                                                                                                                                                                                                             |
| #1                                     | ((frailty) AND (stroke)) AND ((poor functional outcome) AND (Mortality))                                                                                                                                                                                                                                                                                                                                                                                                                                                                                                                                                                                                                                                                                                                                                                                                                                                                                                                                                                                                                                                                                                                                                                                                                                                    |
| <b>SEARCH STRATEGY: GOOGLE SCHOLAR</b> |                                                                                                                                                                                                                                                                                                                                                                                                                                                                                                                                                                                                                                                                                                                                                                                                                                                                                                                                                                                                                                                                                                                                                                                                                                                                                                                             |
| #1                                     | Frailty; Stroke; Transient ischemic attack; Poor functional outcome; Mortality; Cohort studies; Case-control studies; Cross-sectional studies; Observational studies                                                                                                                                                                                                                                                                                                                                                                                                                                                                                                                                                                                                                                                                                                                                                                                                                                                                                                                                                                                                                                                                                                                                                        |

**Supplementary file 2:** Forest plot showing the prevalence of frailty among stroke patients grouped by continent

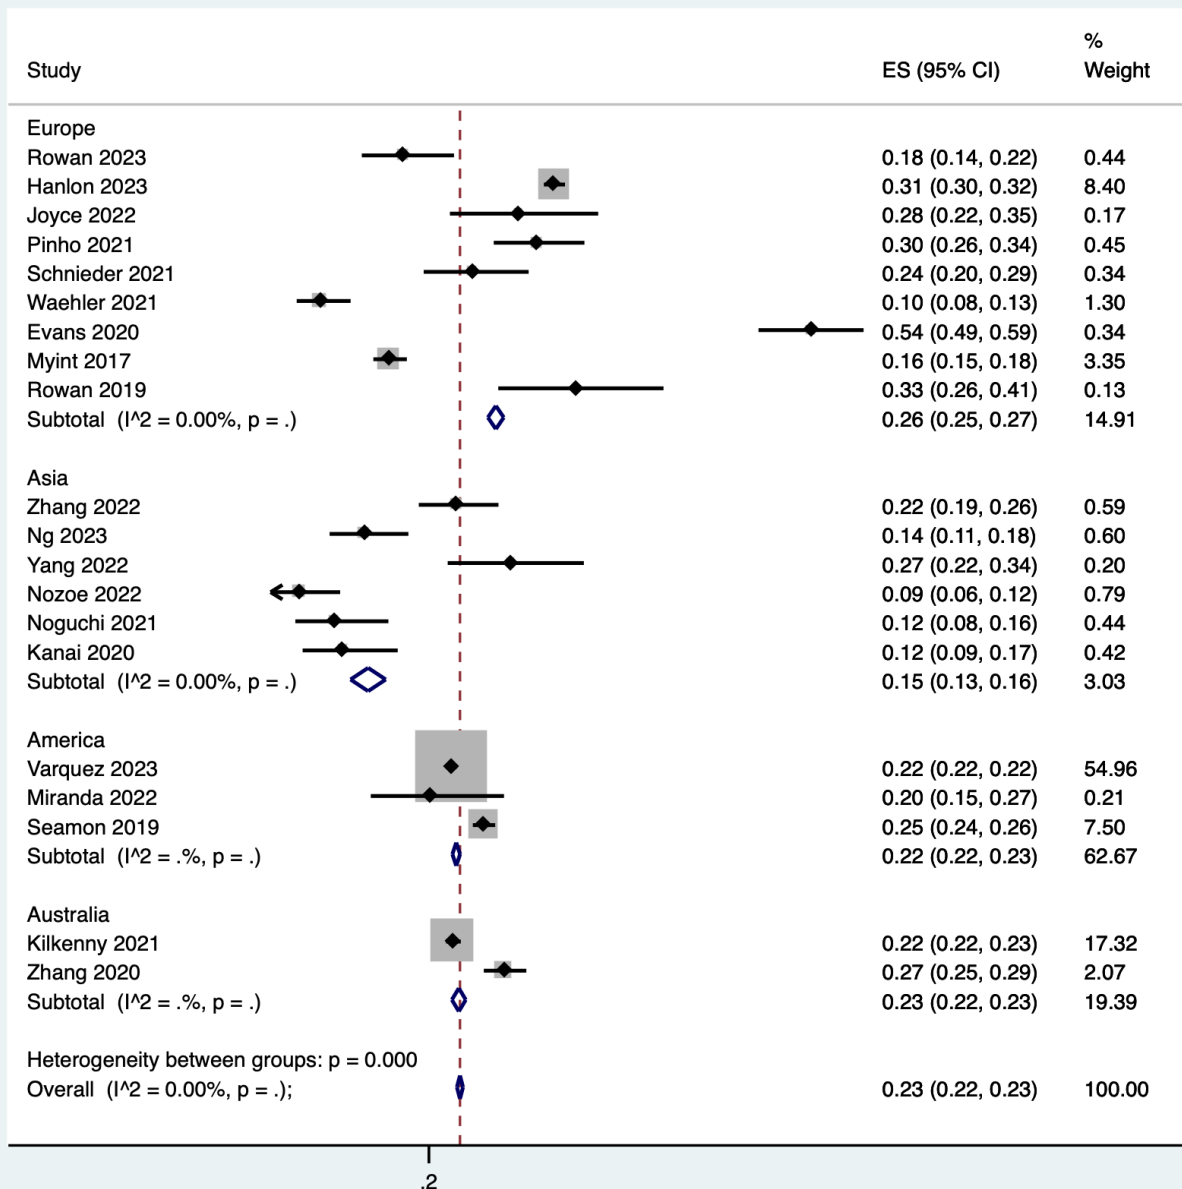

**Supplementary file 3:** Forest plot showing the association between frailty and mortality among stroke patients grouped by continent (unadjusted)

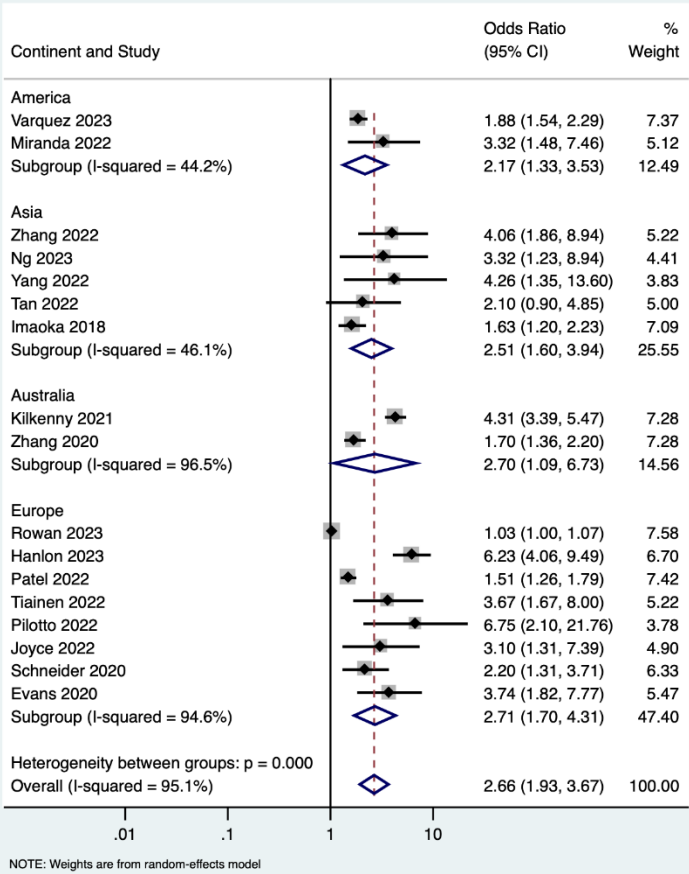

**Supplementary file 4:** Forest plot showing the association between frailty and poor functional outcome among stroke patients grouped by continent (unadjusted)

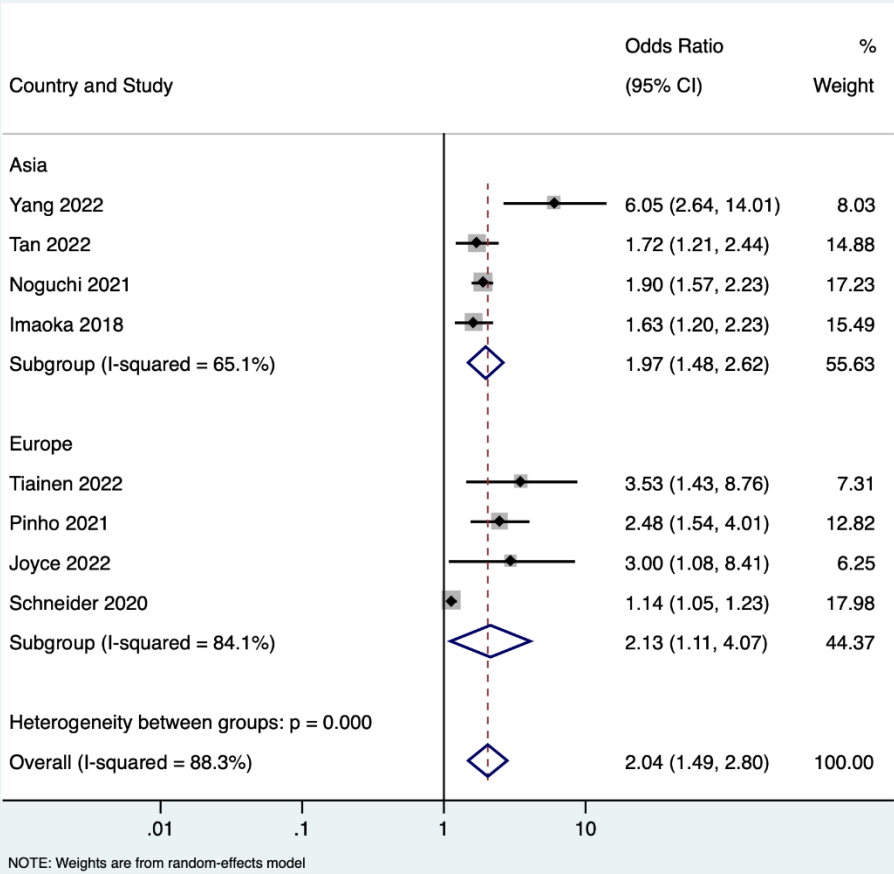

**Supplementary file 5:** Forest plot showing the association between frailty and mortality among stroke patients grouped by continent (adjusted)

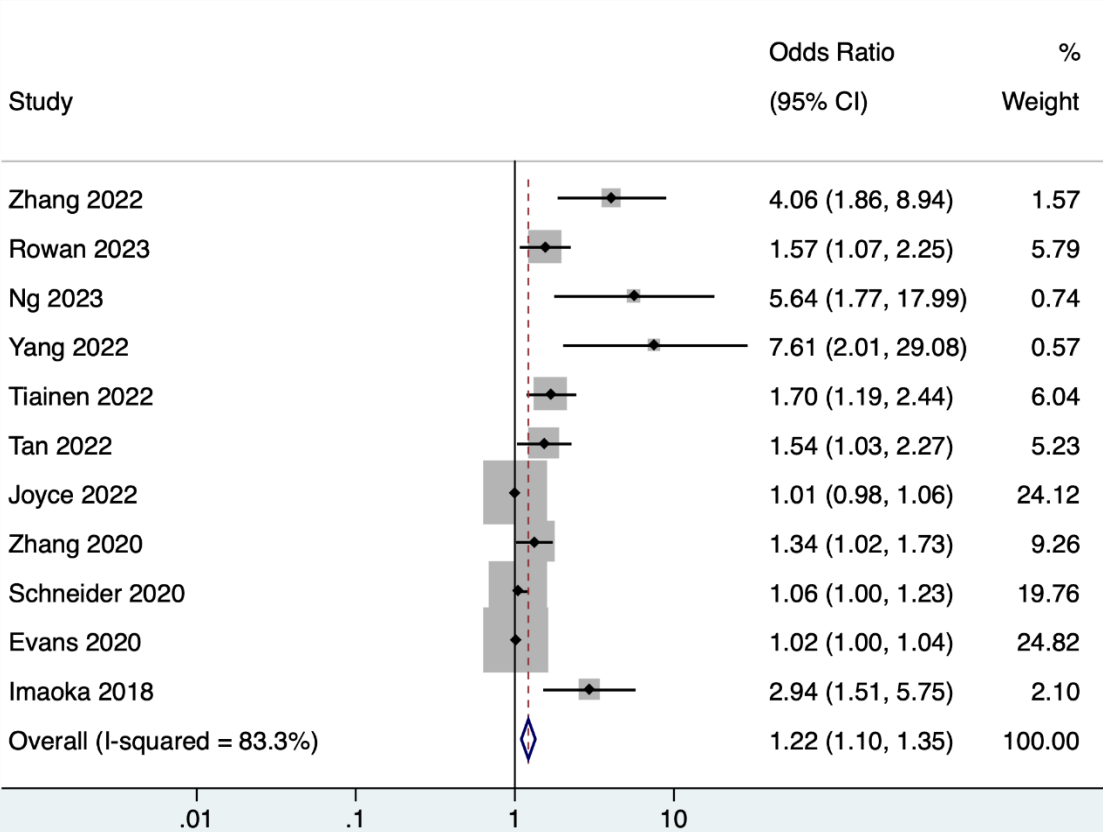

NOTE: Weights are from random-effects model

**Supplementary file 6:** Forest plot showing the association between frailty and poor functional outcome among stroke patients grouped by continent (adjusted)

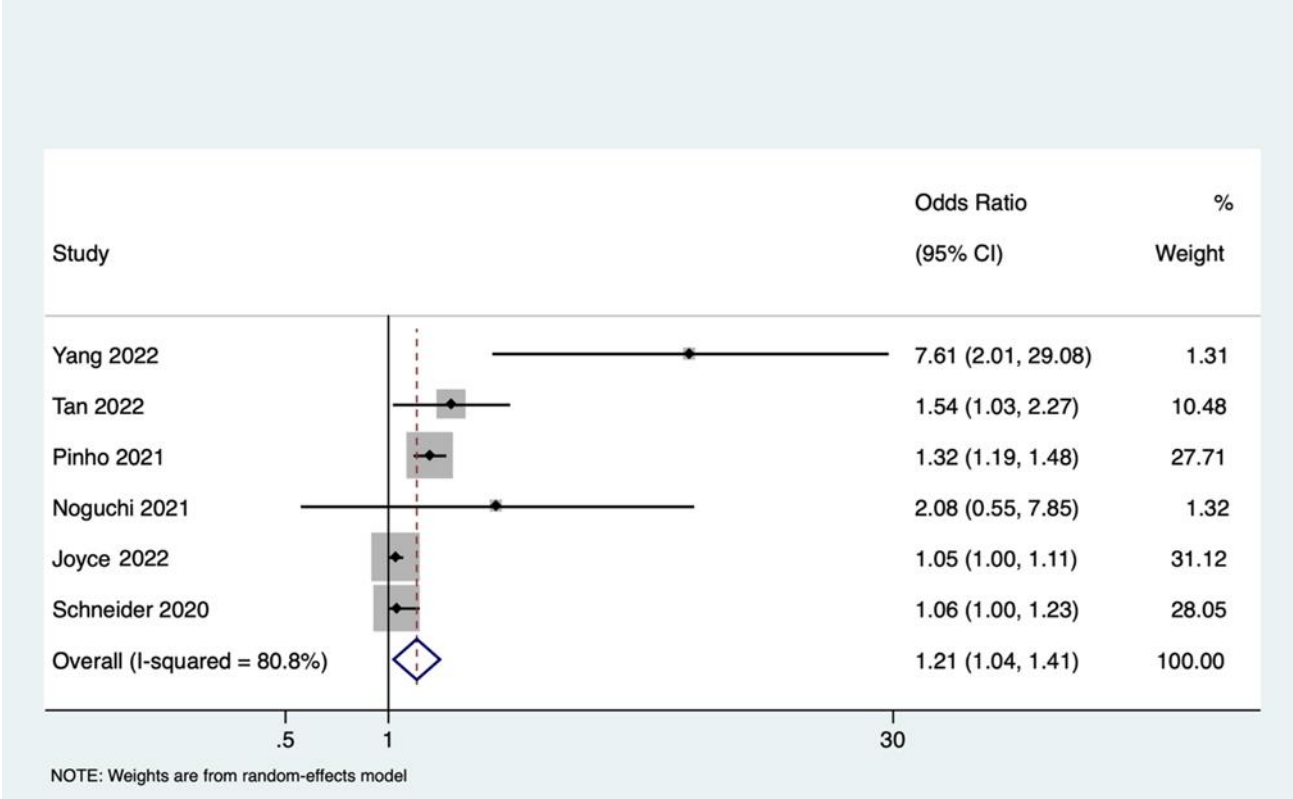

**Supplementary file 7:** Forest plot showing the association between frailty and mortality among stroke patients grouped by continent (adjusted)

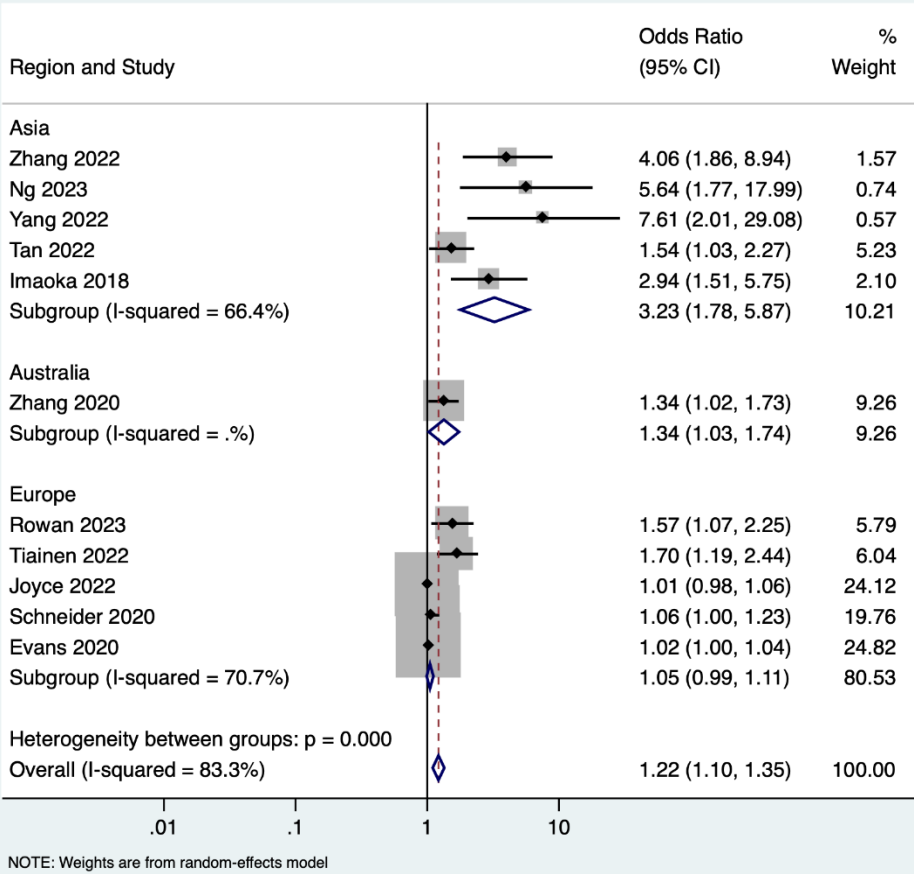



**Supplementary file 8:** Forest plot showing the association between frailty and poor functional outcome among stroke patients grouped by continent (adjusted)

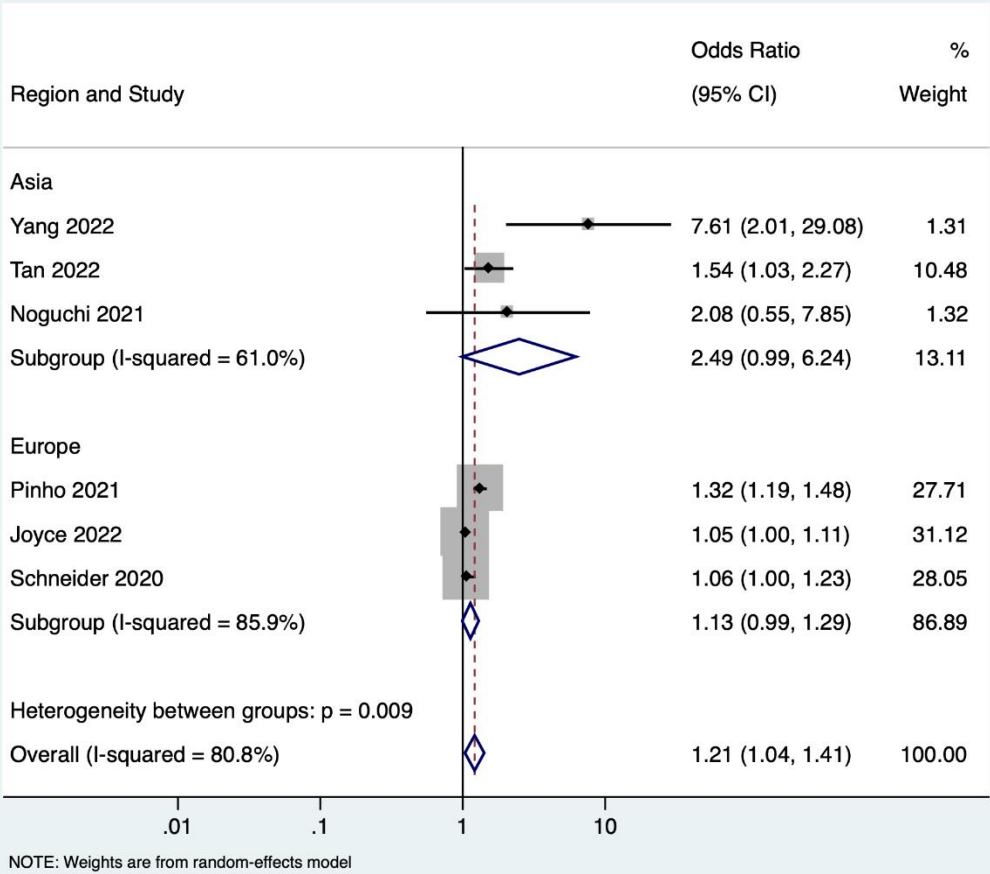

**Supplementary file 9:** Funnel plot showing the publication bias for studies reporting mortality (unadjusted)

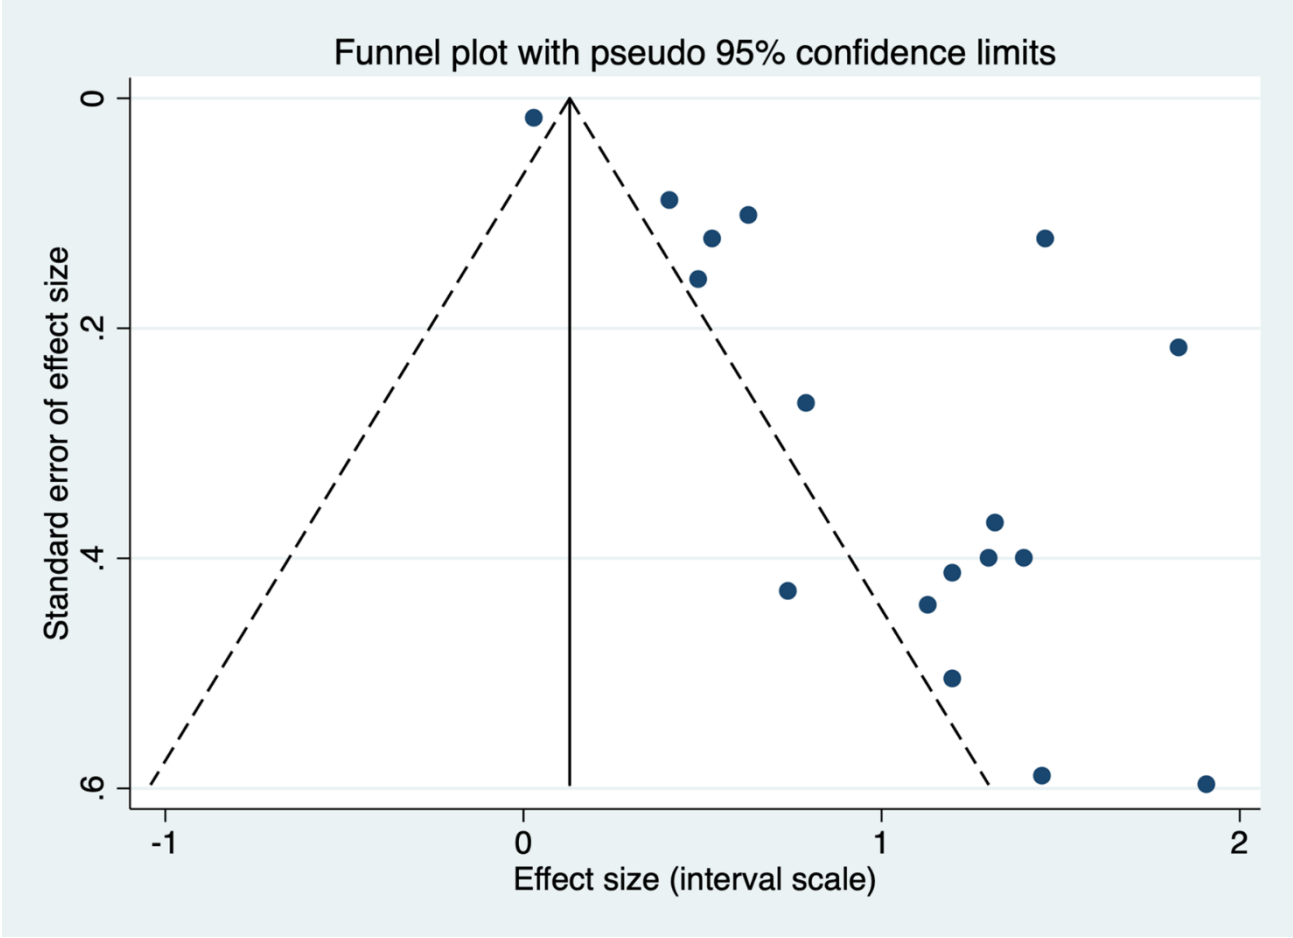

**Supplementary file 10:** Funnel plot showing the publication bias for studies reporting mortality (adjusted)

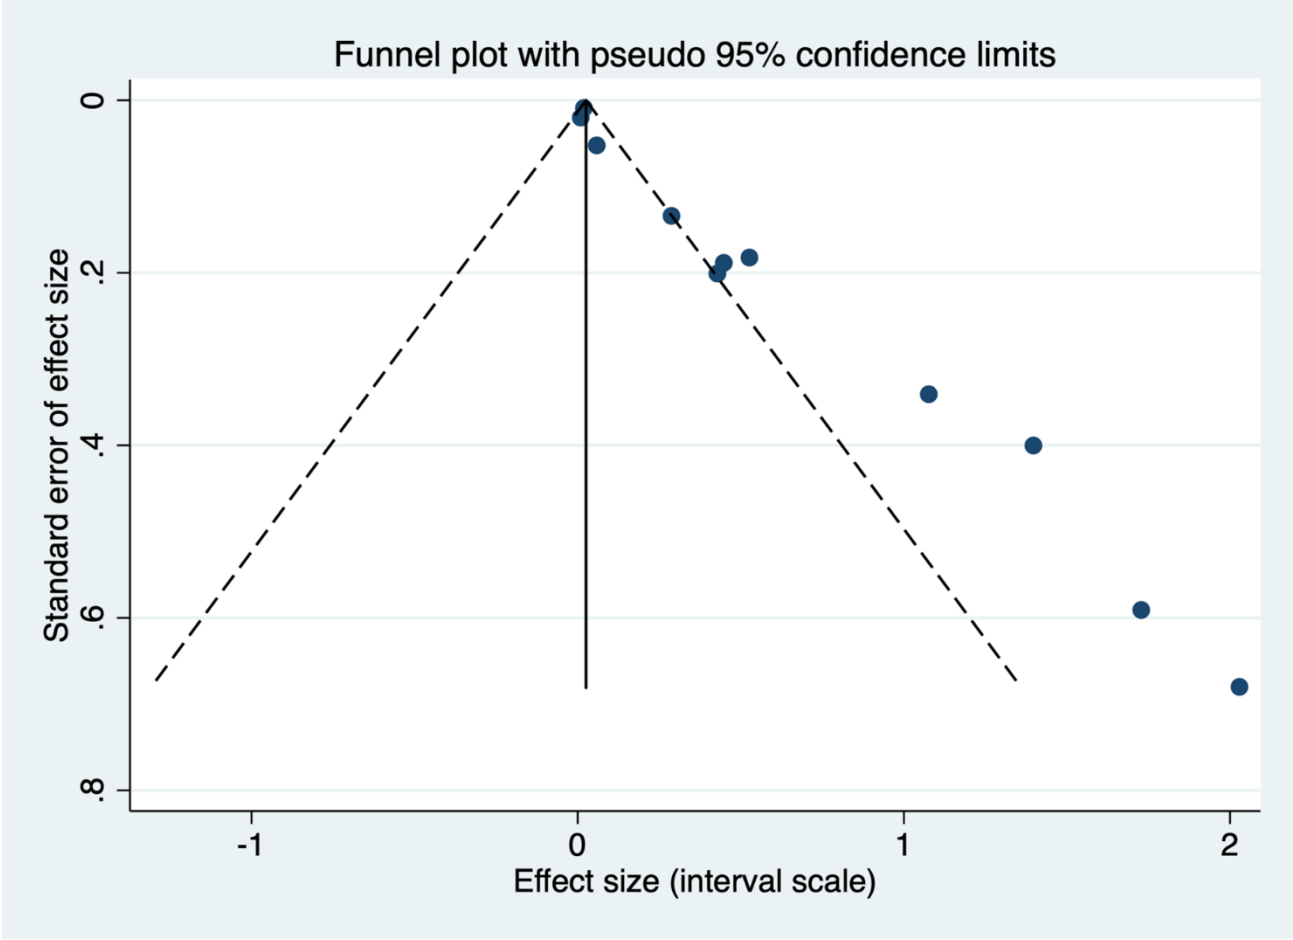

**Supplementary file 11:** Forest plot showing the prevalence of frailty among stroke patients sorted by quality of studies

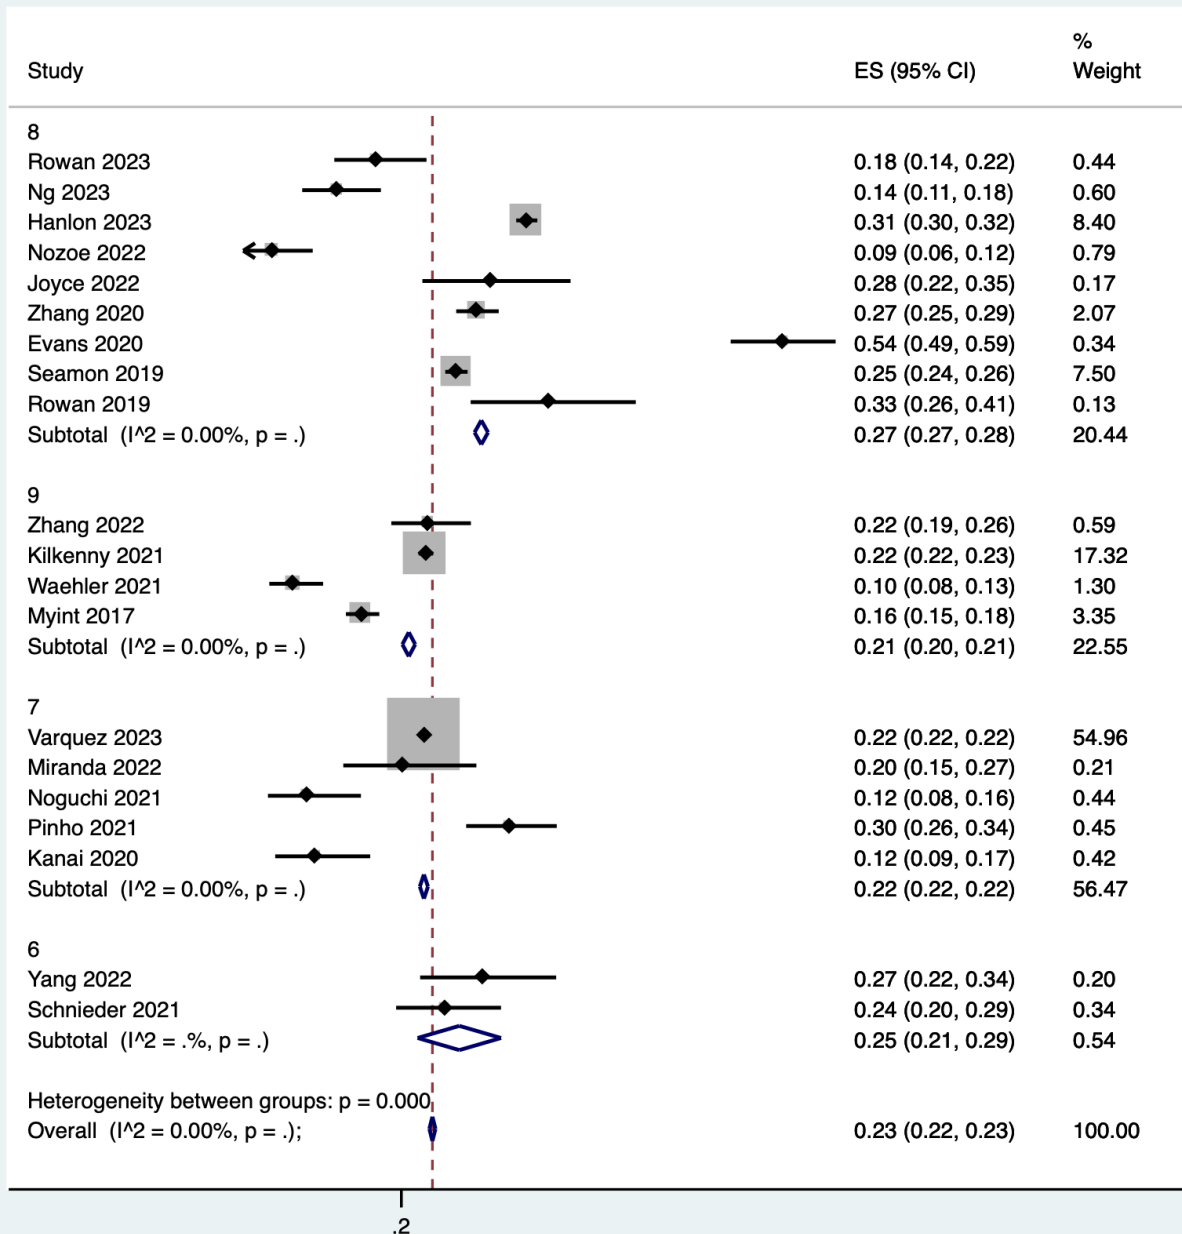

**Supplementary file 12:** Forest plot showing the association between frailty and mortality among stroke patients sorted by quality of studies [unadjusted]

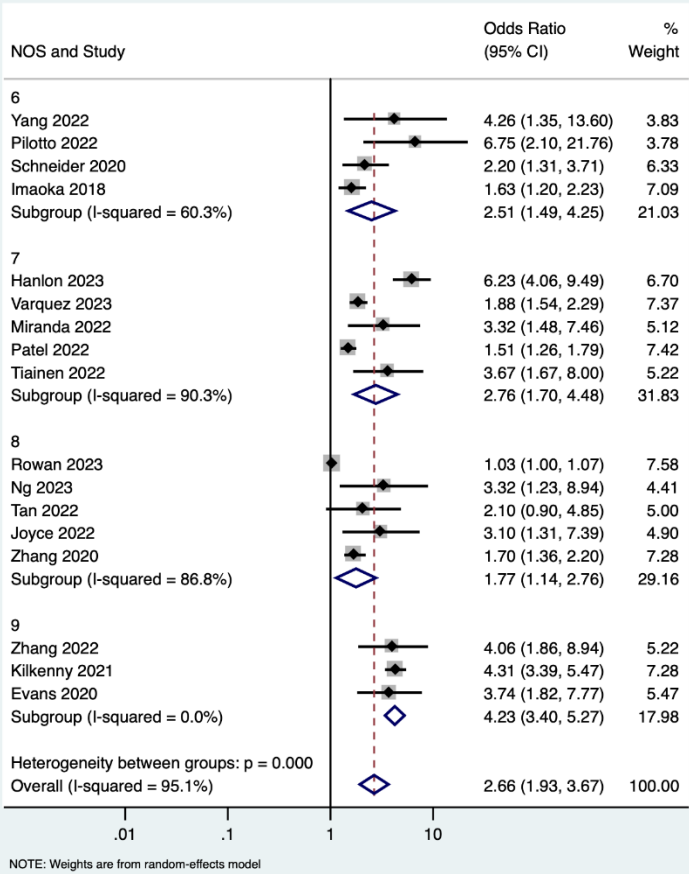

**Supplementary file 13:** Forest plot showing the association between frailty and poor functional outcome among stroke patients sorted by quality of studies [unadjusted]

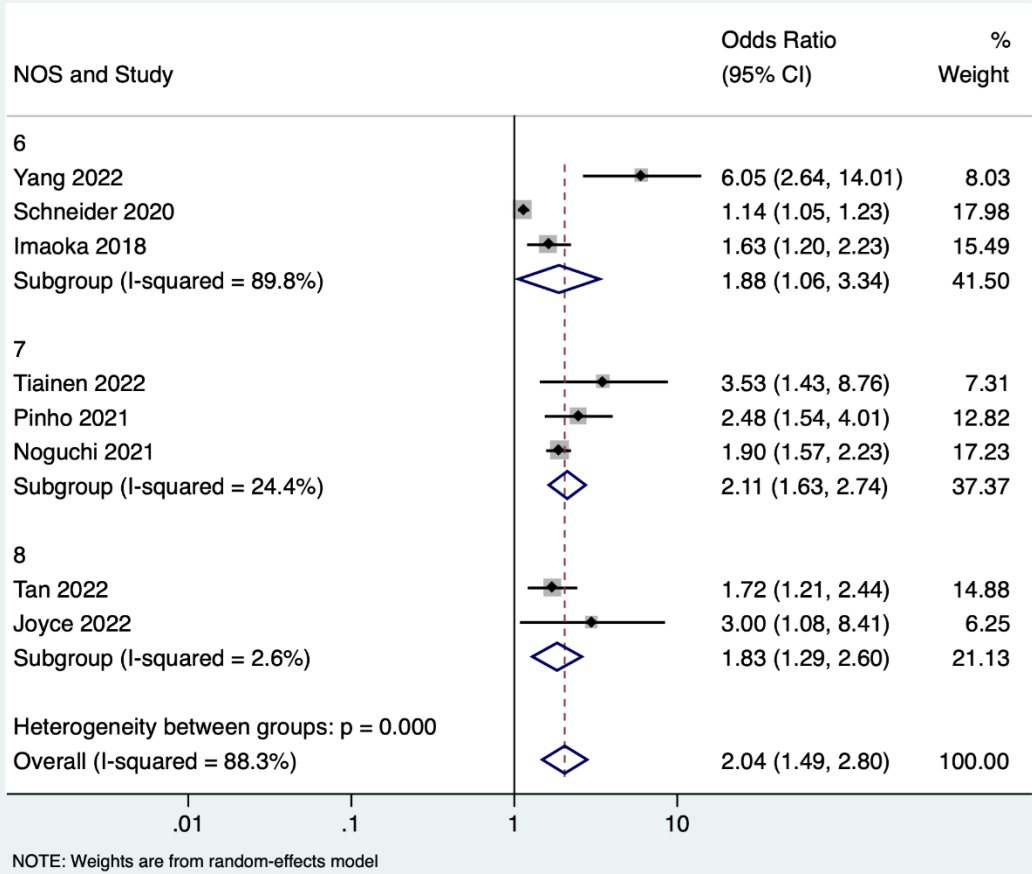

**Supplementary file 14:** Forest plot showing the association between frailty and mortality among stroke patients sorted by quality of studies [adjusted]

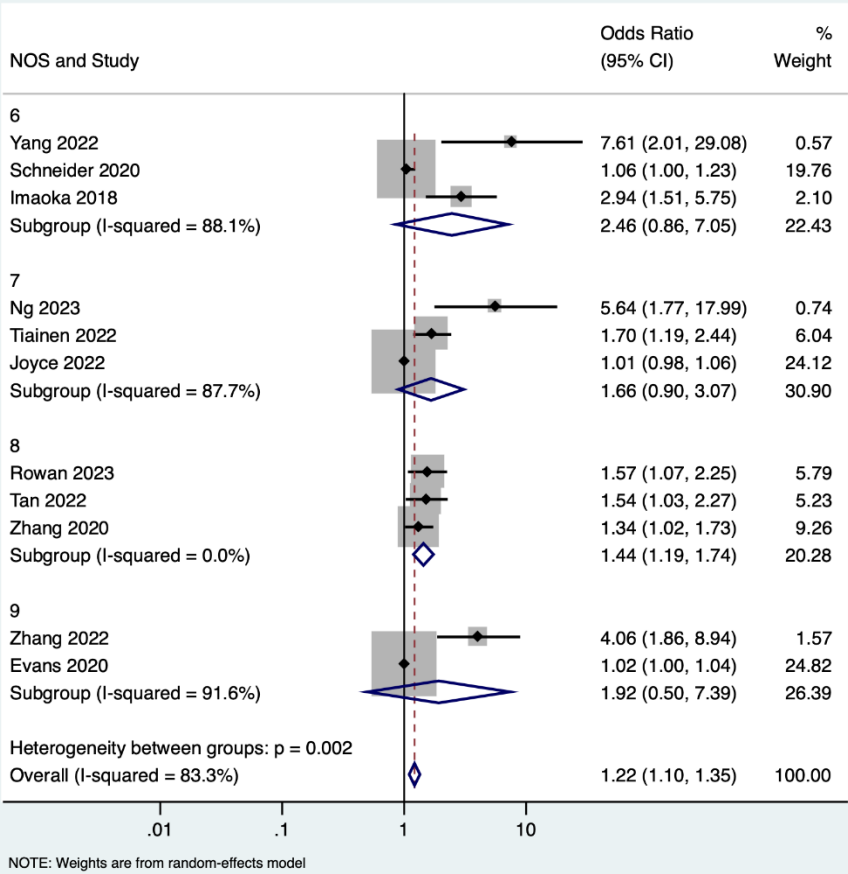

**Supplementary file 15:** Forest plot showing the association between frailty and poor functional outcome among stroke patients sorted by quality of studies [adjusted]

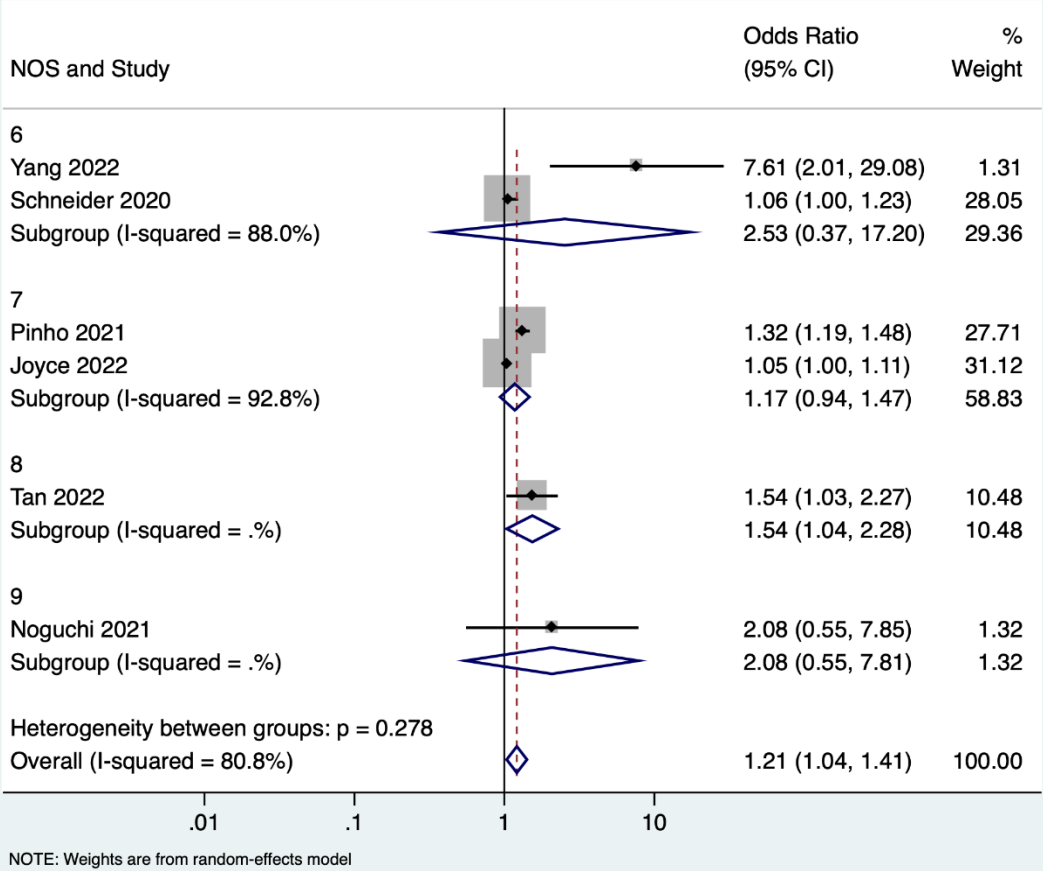



**Supplementary file 16:** Forest plot showing the prevalence of frailty among stroke patients grouped by tool used

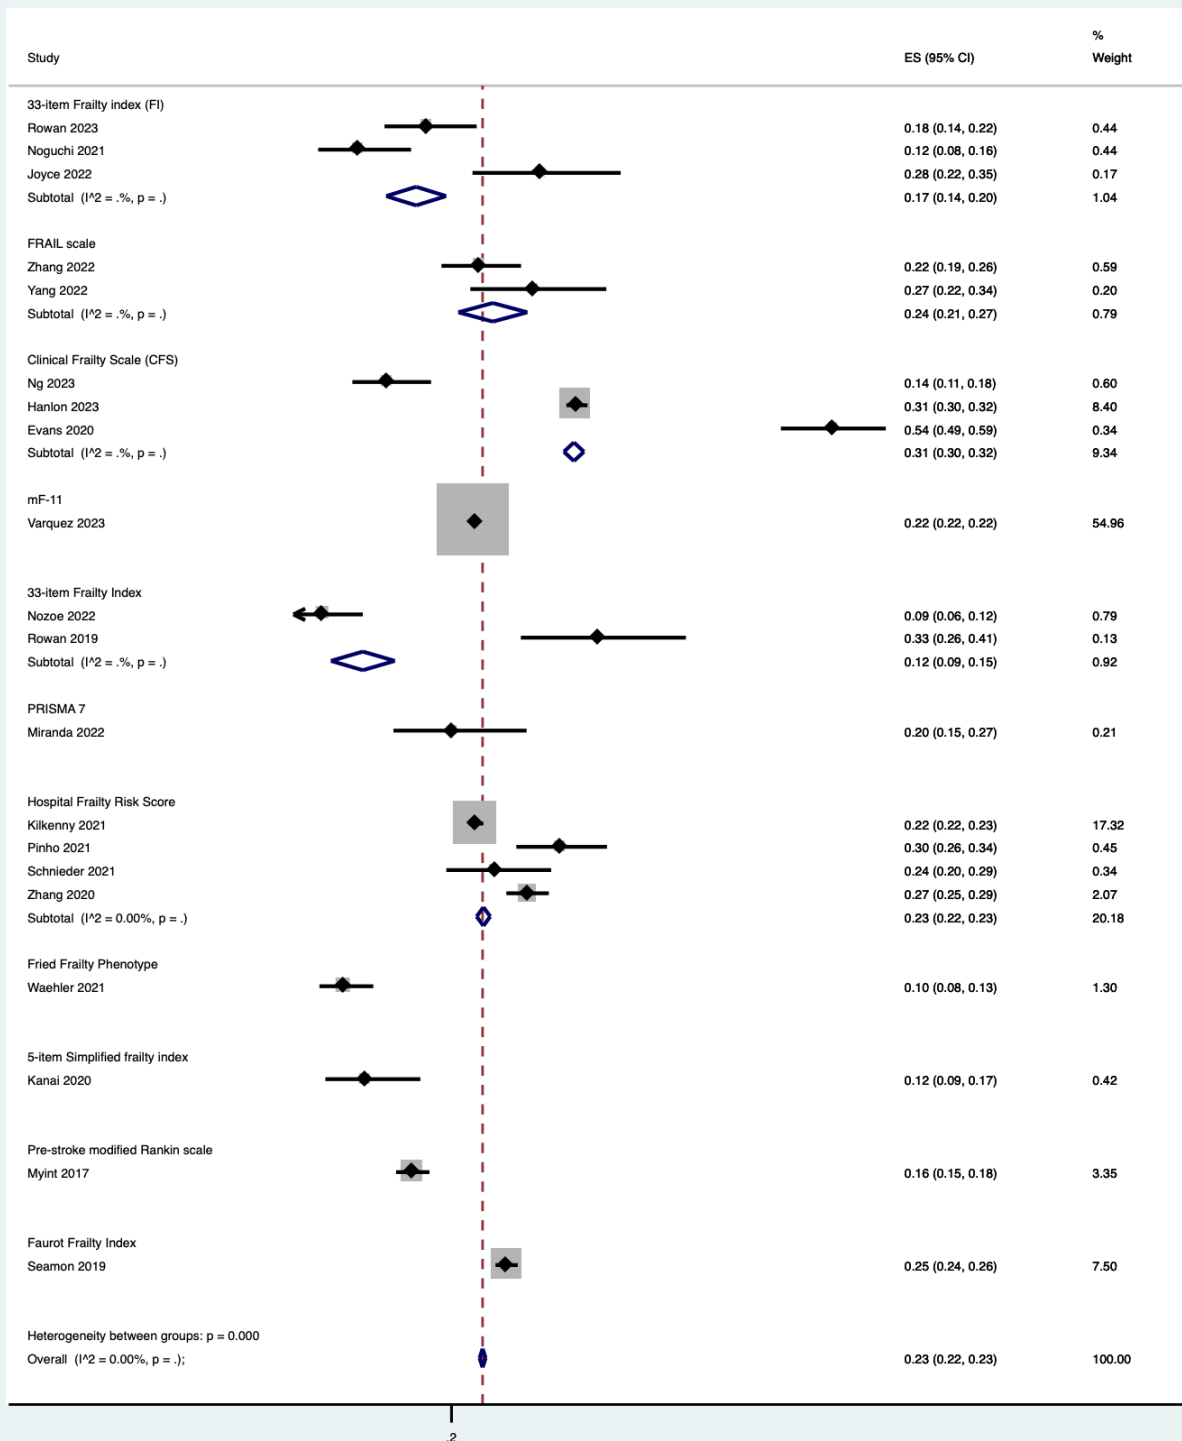

**Supplementary file 17:** Forest plot showing the comparison of hospital stay across frail and non-frail stroke cases

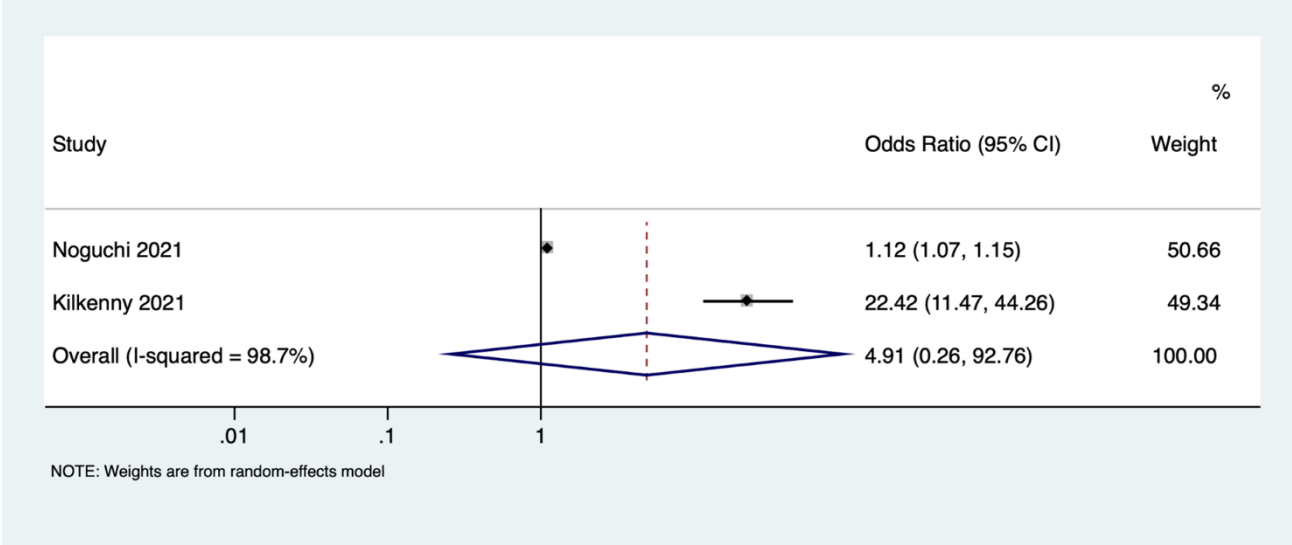

**Supplementary file 18:** Subgroup analysis based on the study design of the included studies for unadjusted mortality estimates

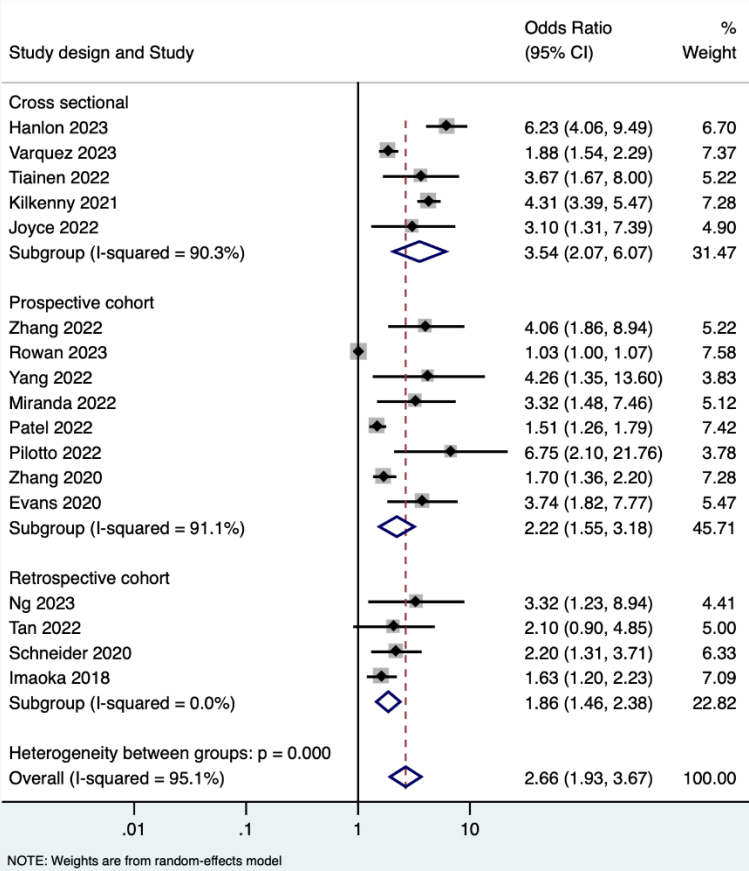

Supplement: Data_Sheet_1.pdf [file Data_Sheet_1.pdf]
